# Supplementary material for: A polyamide 6–organic montmorillonite composite sponge by large-scale solution foaming as a reusable and efficient oil and organic pollutant sorbent
Source: Royal Society of Chemistry journal article supplement (doi:10.1039/c9sm01444f), 2019-01-01
Supplement: c9sm01444f1.pdf [file c9sm01444f1.pdf]

## Supporting information

# Polyamide 6-Organic Montmorillonite Composite Sponge by Large-scale Solution Foaming as Reusable and Efficient Oil and Organic Pollutants Sorbent

Liang Wang \*, Chuan-yong Liu, Qiu-mi Huang, Ying An, Jie Fan and Yong Liu \*

School of Textiles, Key Laboratory of Advanced Textiles Composites of Ministry of Education, Tiangong University, Binshui West Road 399, Xiqing Distinct, 300387, Tianjin, China.

\*Correspondence: Liang Wang, liangwang@tjpu.edu.cn; Yong Liu, liuyong@tjpu.edu.cn. Tel: +86-22-83955298. Binshui West Road 399, Xiqing Distinct, 300387, Tianjin, China.

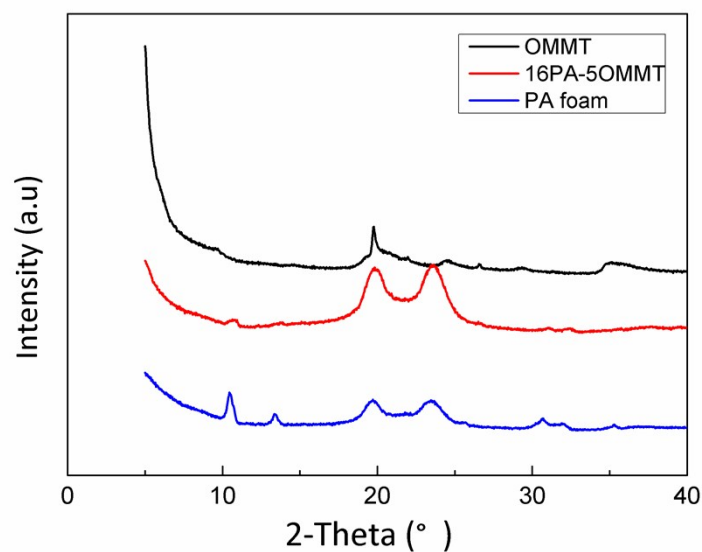

Figure S1. XRD patterns of raw OMMT, PA and representative PA-OMMT foams.

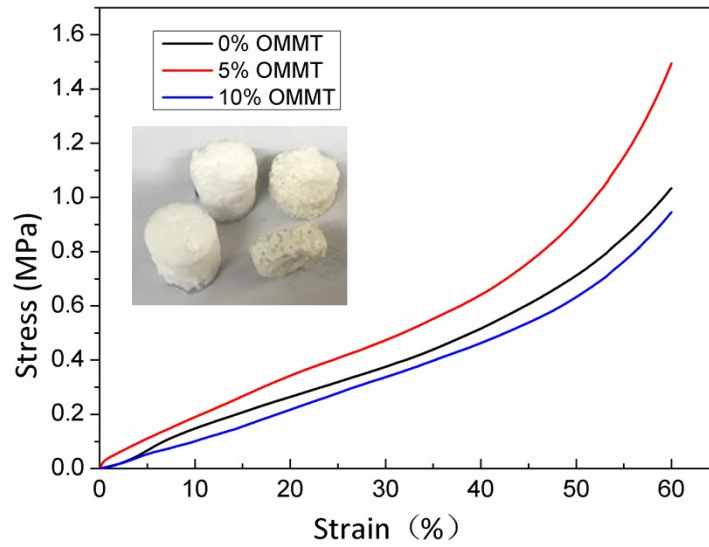

Figure S2. Compressive curves of prepared representative PA-based foams.

Table S1. Compressive mechanical properties of PA-OMMT composite foams.

| Sample     | $\sigma_{10\%}$ (MPa) | $\sigma_{60\%}$ (MPa) | E (MPa) |
|------------|-----------------------|-----------------------|---------|
| PA6        | 0.15                  | 0.99                  | 0.62    |
| PA-5%OMMT  | 0.20                  | 1.54                  | 4.31    |
| PA-10%OMMT | 0.09                  | 2.92                  | 1.96    |

Table S2. Water adsorption properties of PA-based foams.

| Sample             | Adsorption Capacity (g/g) | Adsorption Saturation Time (s) |
|--------------------|---------------------------|--------------------------------|
| PA                 | ~10                       | 5~10s                          |
| PA-10%OMMT         | 5.5                       | 50s~60s                        |
| PA-10%OMMT-0.5%MTS | 2.4                       | >300s                          |

Table S3. Viscosity of oil and organic solvent used and saturation adsorption time of sample 16PA-10OMMT to different oils.

| Oil type           | Viscosity (m Pa) | Saturation adsorption time |
|--------------------|------------------|----------------------------|
| Soybean oil        | 12               | 12                         |
| Gasoline oil       | -                | 8                          |
| Mineral oil        | 44               | 22                         |
| Vacuum pump oil    | 43               | 20                         |
| N-hexane           | -                | 6                          |
| Anhydrous ethanol  | 1.2              | 8                          |
| Dimethyl formamide | -                | 6                          |

“-” means the viscosity of oil is too low to be measured.

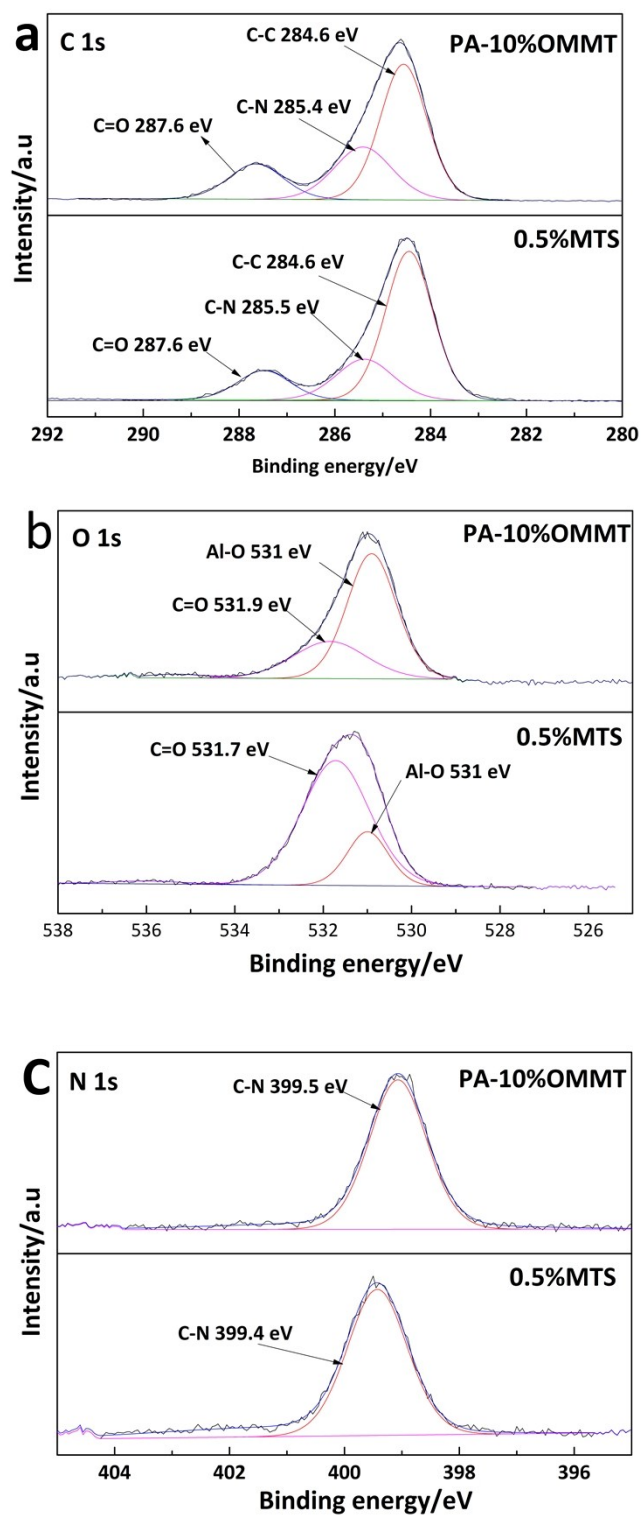

Figure S3. X-ray photoelectron spectroscopy (XPS) spectra of sample 16PA-10OMMT and 0.5%MTS-20min: high-resolution scans of (a) C1s; (b) O1s; (c) N1s.
